# Supplementary material for: Probing the active fraction of soil microbiomes using BONCAT-FACS
Source: PubMed Central journal article supplement (PMC6591230; doi:10.1038/s41467-019-10542-0), 2019-06-24
Supplement: 41467_2019_10542_MOESM1_ESM.pdf [file 41467_2019_10542_MOESM1_ESM.pdf]

# Supplementary information

Probing the active fraction of  
soil microbiomes using BONCAT-FACS

*Couradeau et al.*

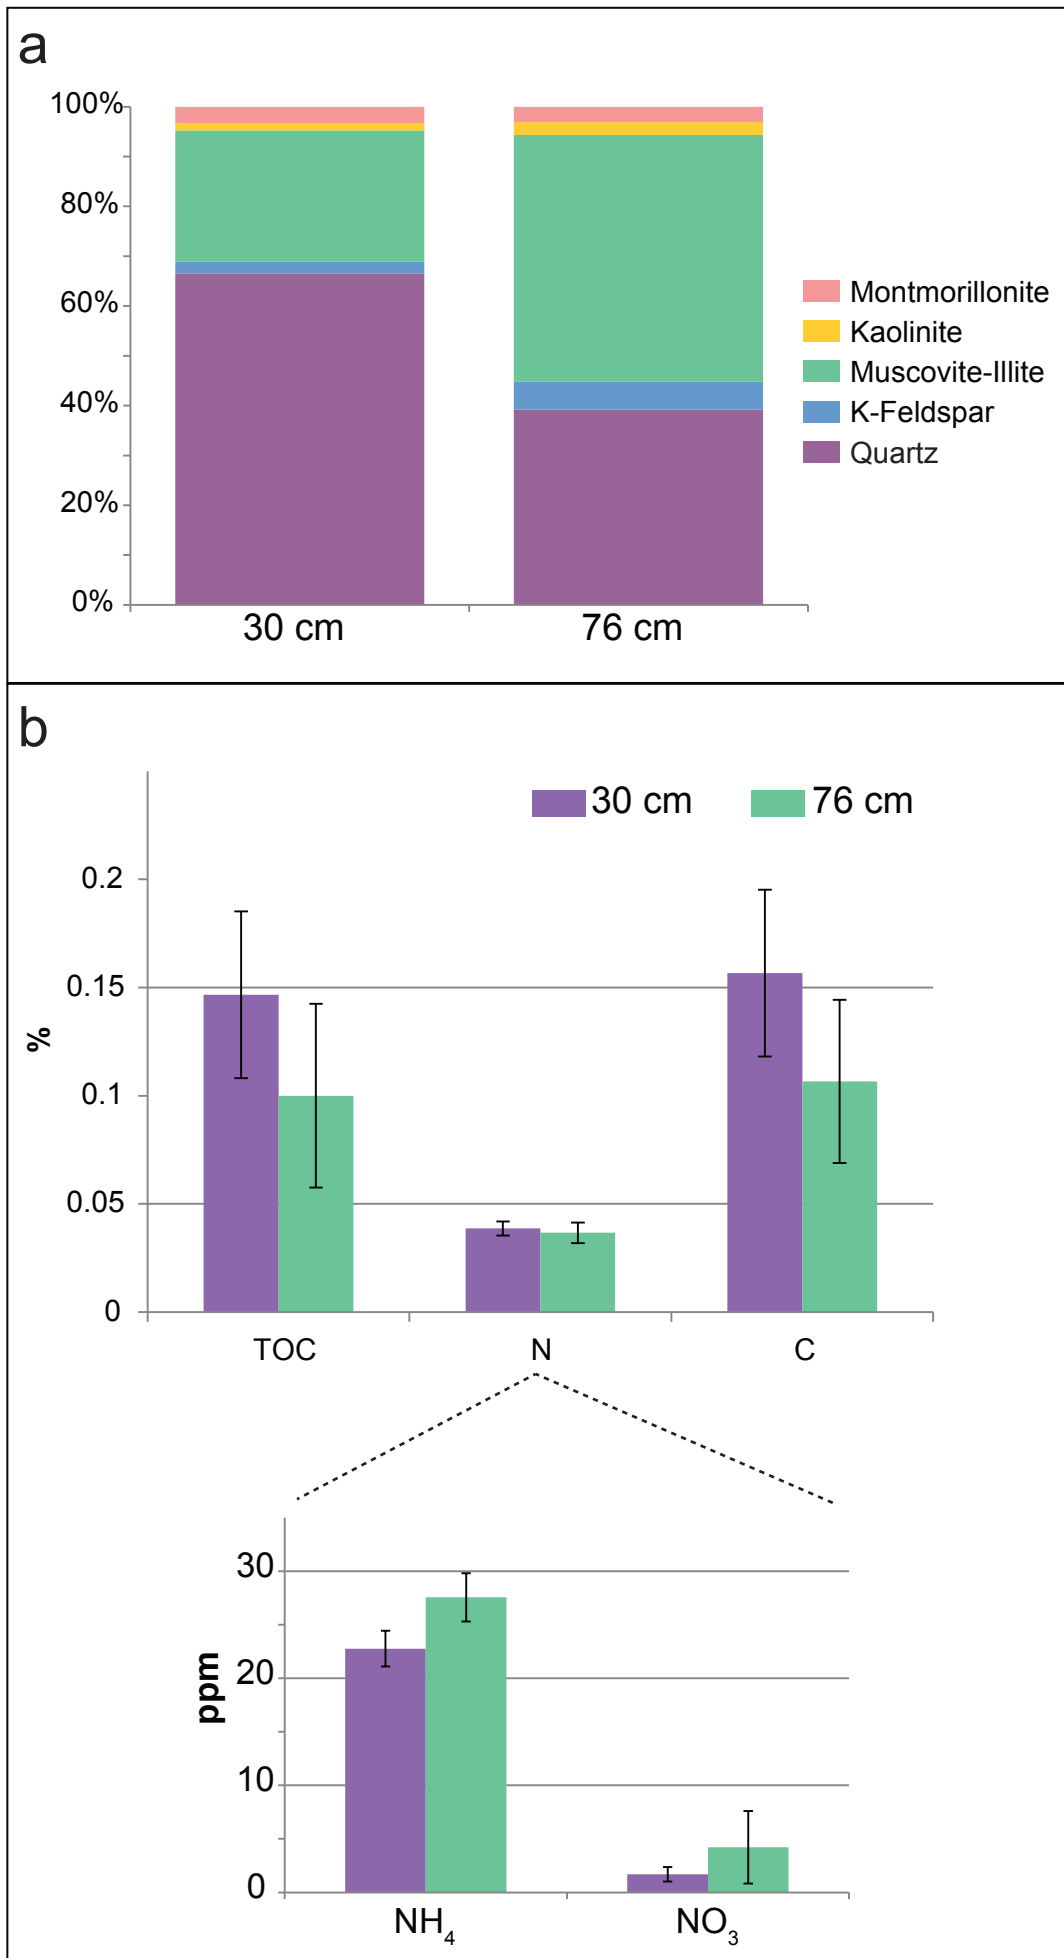

**Supplementary Figure 1**

Soils properties (a) Mineral composition (b) Total C, TOC, Total N, ammonium and nitrate concentration Error bars represent standard deviation (n=3). Ppm, parts per million.

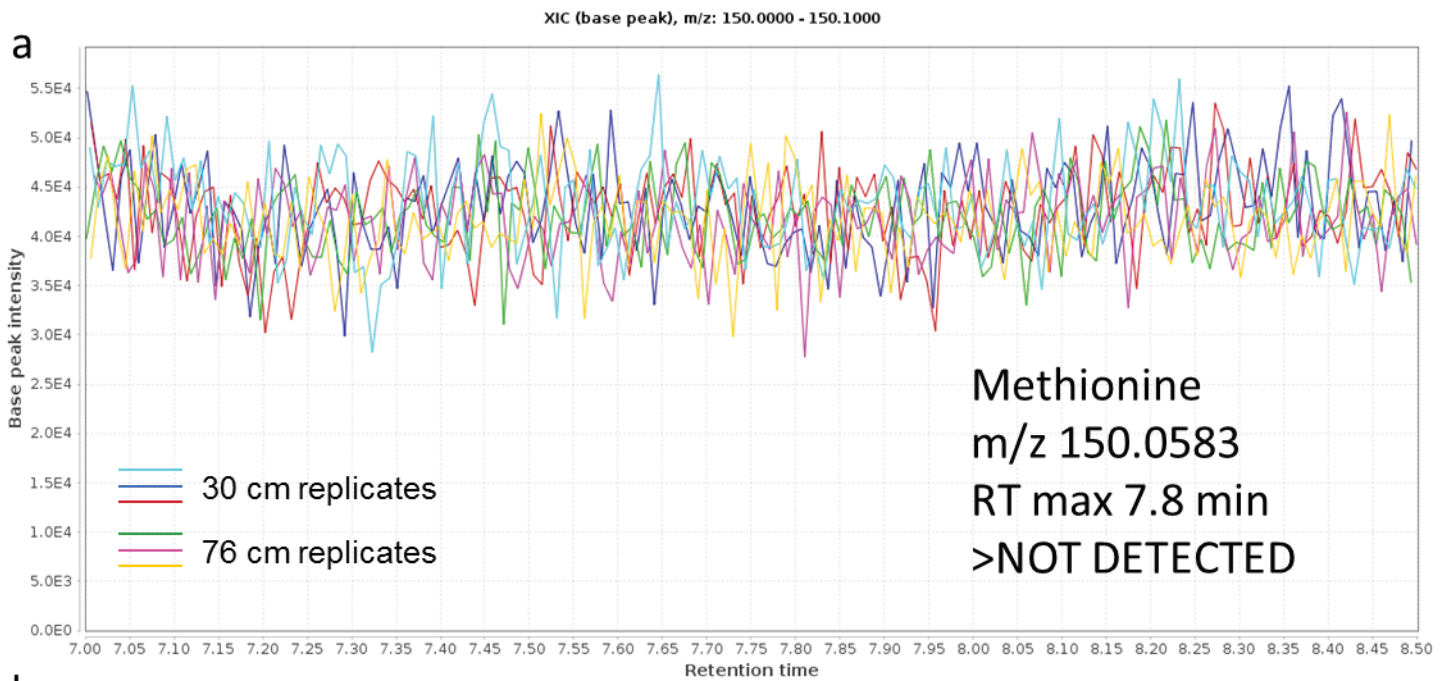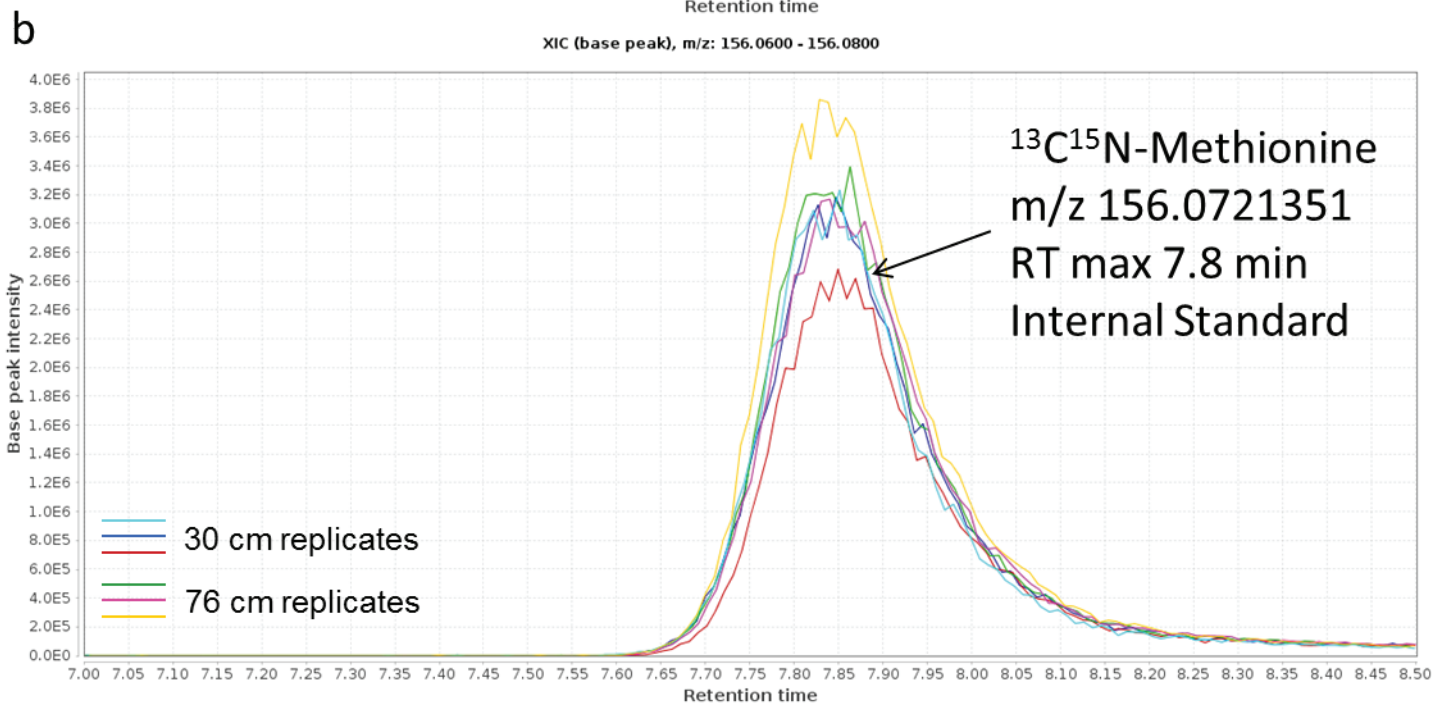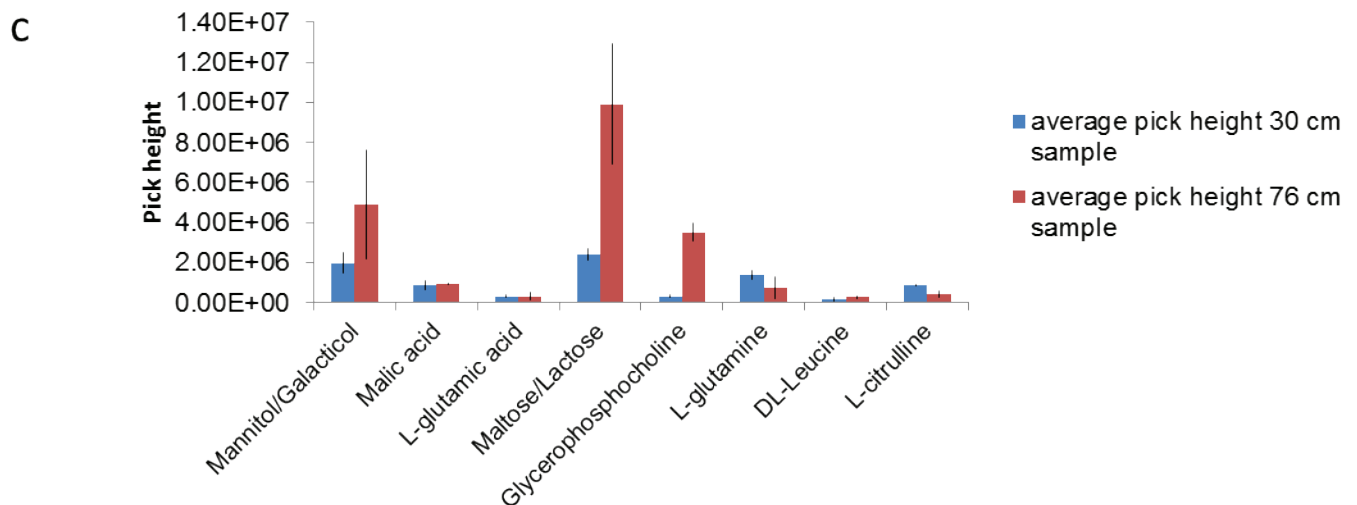

### Supplementary Figure 2

LC-MS analysis of the full soil water extract showing that (a) there is no detectable amount of methionine, although (b) the spiked labeled heavy methionine was easily detected in all samples. (c) Peak height of the 8 compounds that passed our identification criteria (see methods). Data are means  $\pm$  SD (n=3).

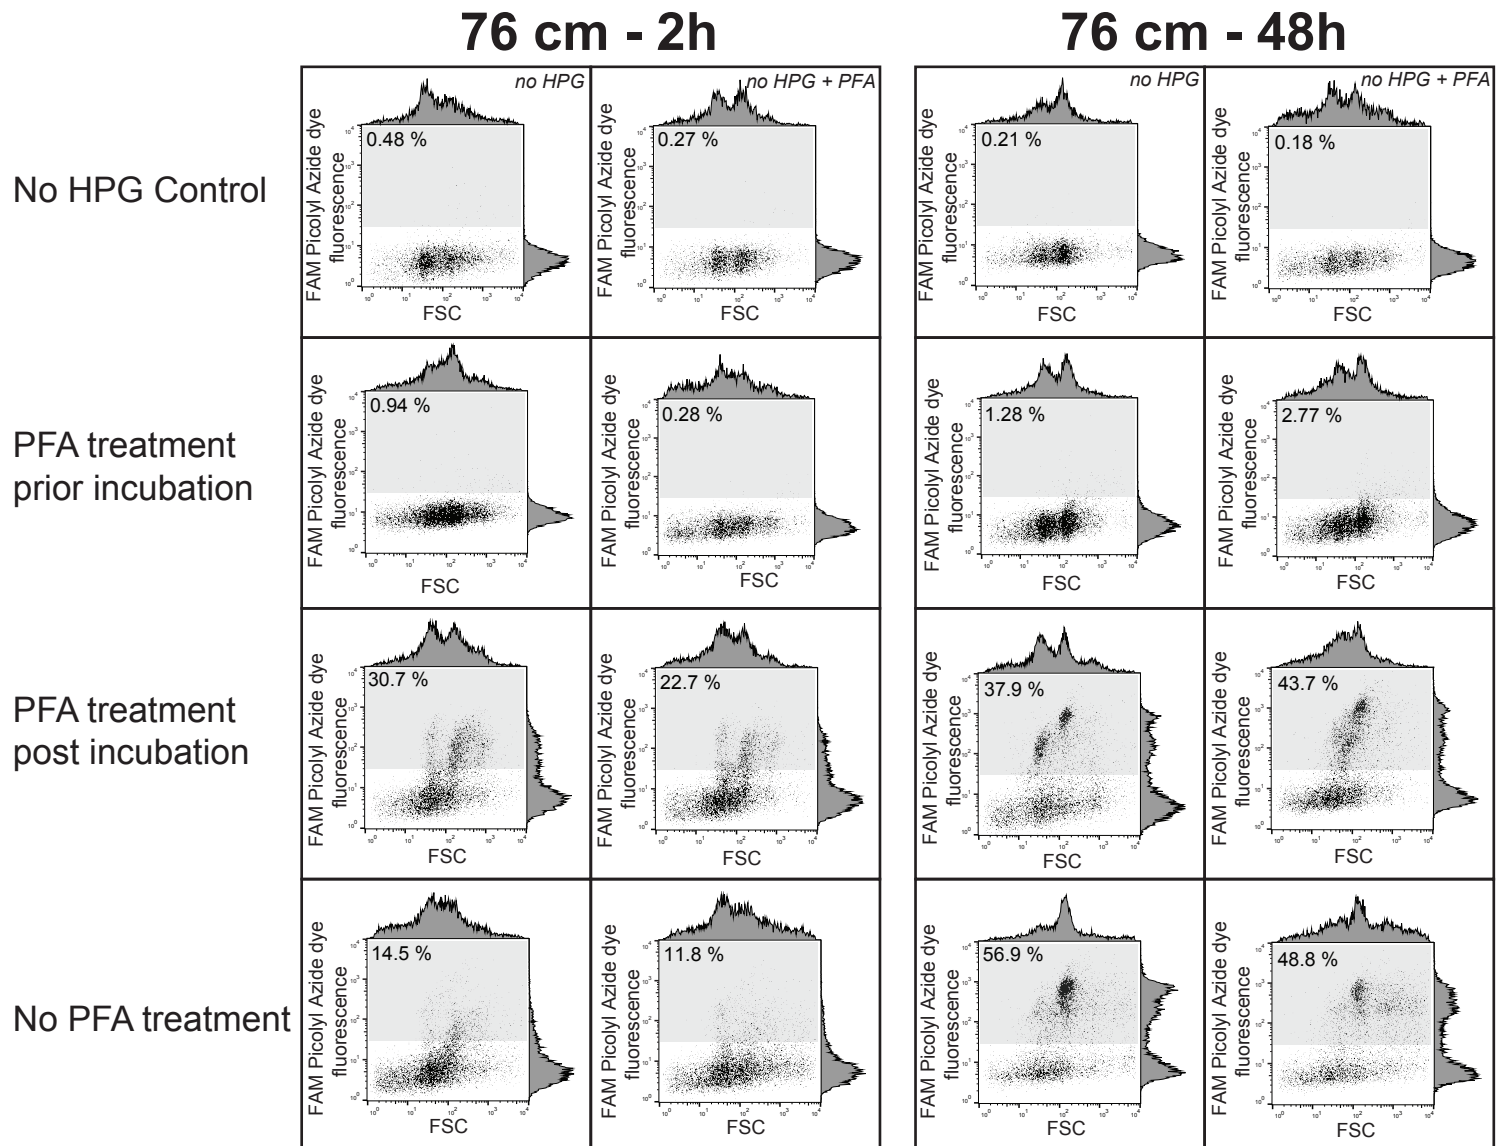

### Supplementary Figure 3

BONCAT labeling of fixed and unfixed cells. Cells stained with SYTO dye plotted according to their forward scatter signal (FSC, x-axis) and BONCAT fluorescence, y-axis) in log-log scale. The distribution of the events along the x and y-axis is shown respectively on the density plot on the top and on the right of each graph. The BONCAT+ cells gate is displayed as a gray box in each plot, and the percent cells in the BONCAT+ gate is indicated in the top left corner of the box. The left two columns are biological replicates from 76 cm soil incubated for 2 h, and the right two for 48 h. Each row of panels corresponds to a different treatment, the first row being control samples without HPG (with or without PFA fixation), the second corresponds to samples that were pre-treated with PFA before incubation, while the third corresponds to samples where cells were fixed with PFA after incubation. The last row corresponds to samples that were not fixed, i.e. the same treatment used for when sorting and sequencing BONCAT+ and BONCAT- cells.

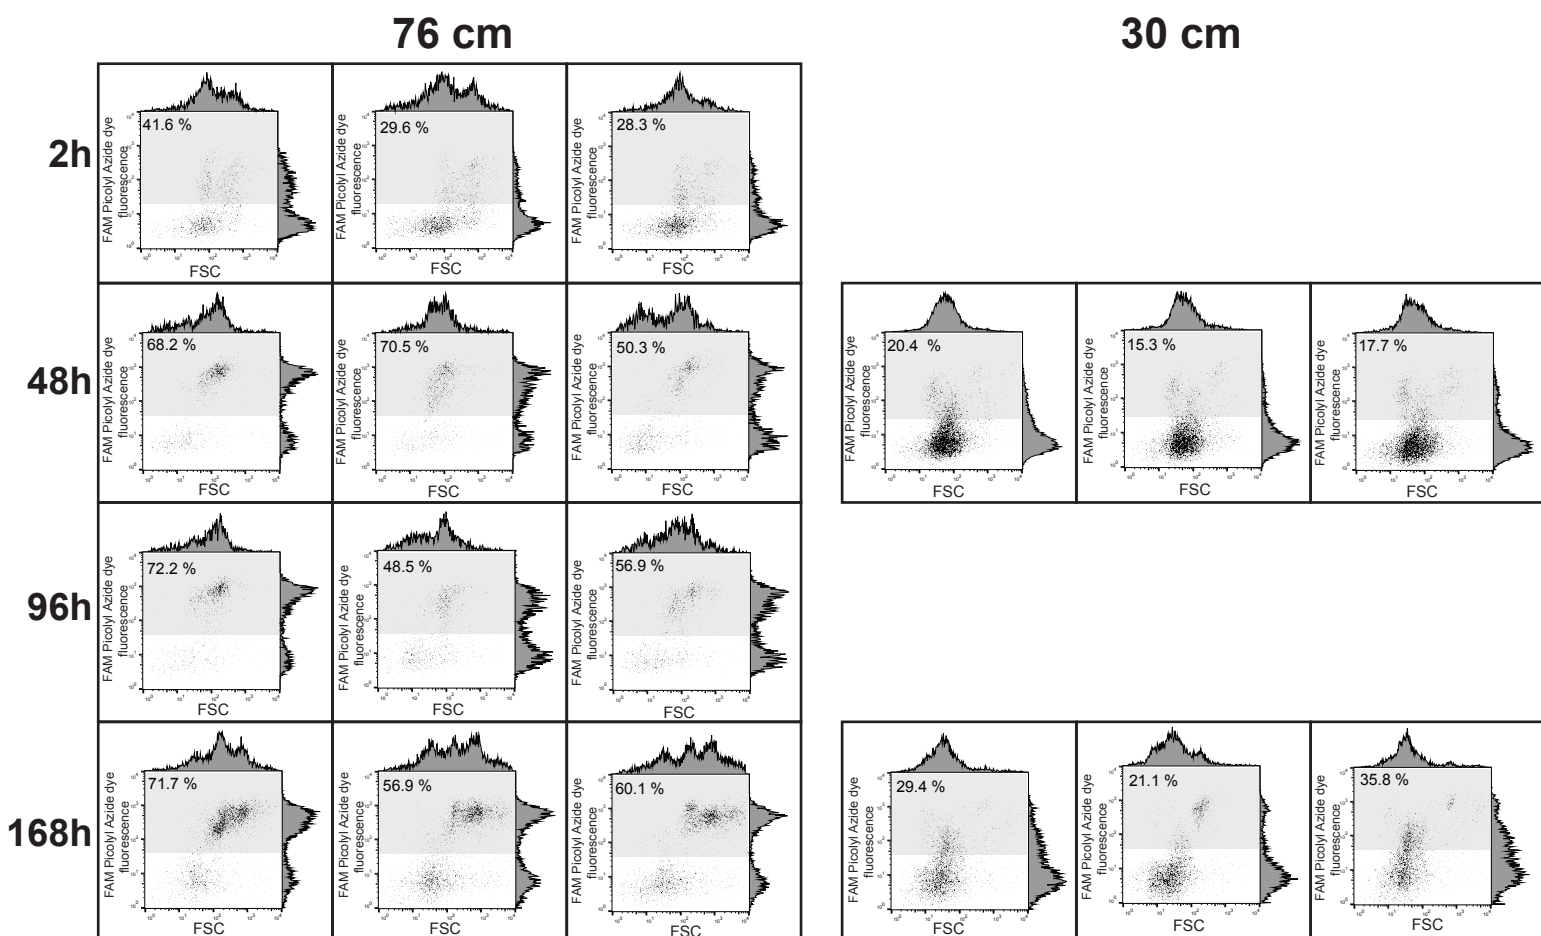

#### Supplementary Figure 4

BONCAT labelling over time of the 30 cm and the 76 cm samples. Cells stained with SYTO dye plotted according to their forward scatter signal (FSC, x-axis) and BONCAT fluorescence (Ex: 488nm/Em: 530nm, y-axis) in log-log scale. The distribution of the events along the x and y-axis is shown respectively on the density plot on the top and on the right of each graph. The left three columns are biological replicates from 76 cm and the right three from 30 cm soil. Each row corresponds to an incubation time (2 h to 168 h). The BONCAT+ cells gate is displayed as a gray box in each plot, and the percent cells in the BONCAT+ gate is indicated in the top left corner of the box.

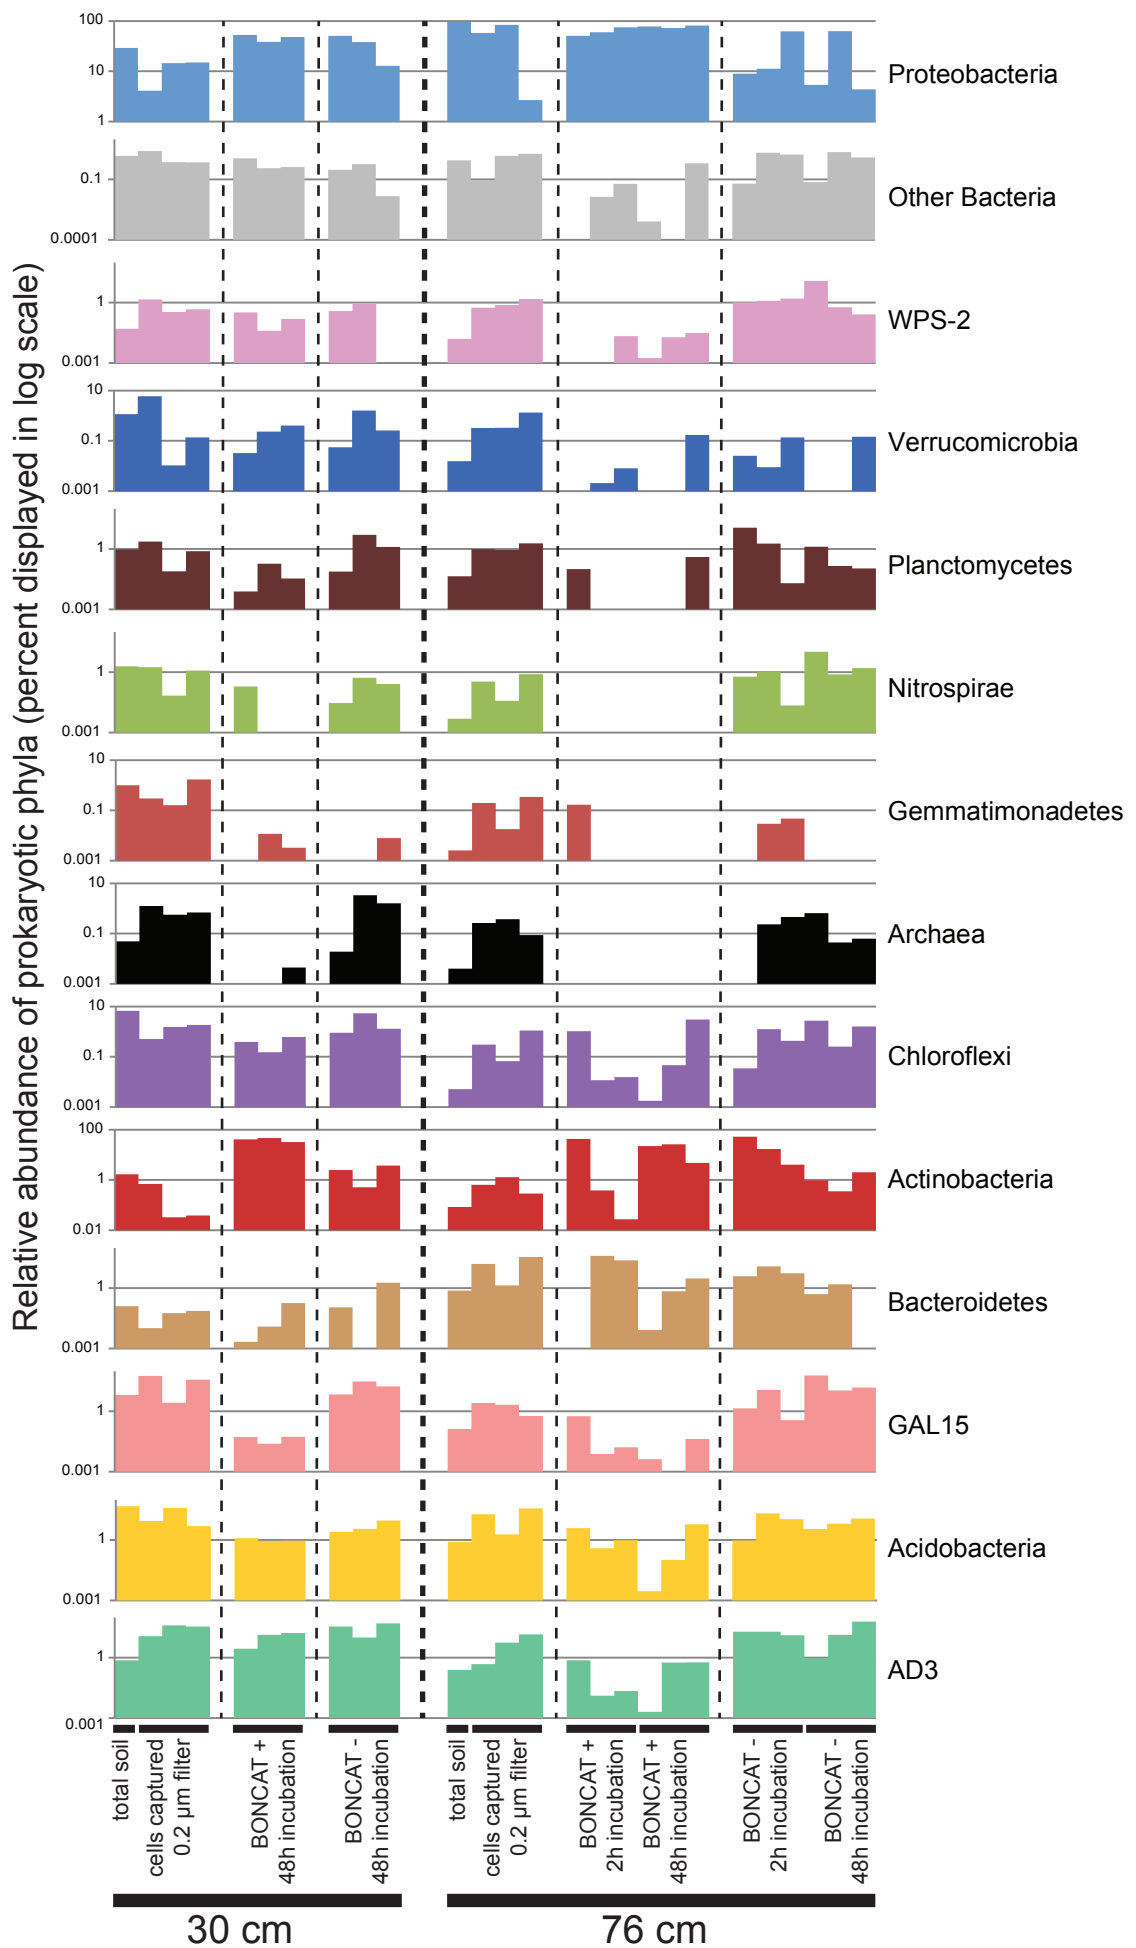

### Supplementary Figure 5

Relative abundance of prokaryotic phyla displayed in log scale. The data displayed are the same than the Figure 2A, however they are plotted phylum by phylum and in log scale therefore allowing a better comparison of the low abundance phyla.

**Supplementary table 1:** Sample description, pooling strategy and alpha diversity metric of the iTag libraries

| Sample ID          | Sample depth | Incubation time | Type     | Number of cells pooled | Frequency* per sample before filtering contaminants | Frequency* per sample without contaminant | ESV** count | OTU count (97% sim. cluster) |
|--------------------|--------------|-----------------|----------|------------------------|-----------------------------------------------------|-------------------------------------------|-------------|------------------------------|
| 30cm_48h_A_BONCAT+ | 30 cm        | 48h             | BONCAT + | 50000                  | 258672                                              | 257606                                    | 138         | 97                           |
| 30cm_48h_A_BONCAT- | 30 cm        | 48h             | BONCAT - | 75000                  | 140530                                              | 136389                                    | 77          | 51                           |
| 30cm_48h_B_BONCAT+ | 30 cm        | 48h             | BONCAT + | 75000                  | 236375                                              | 234877                                    | 203         | 144                          |
| 30cm_48h_B_BONCAT- | 30 cm        | 48h             | BONCAT - | 75000                  | 82431                                               | 81186                                     | 171         | 123                          |
| 30cm_48h_D_BONCAT+ | 30 cm        | 48h             | BONCAT + | 75000                  | 279152                                              | 278404                                    | 178         | 126                          |
| 30cm_48h_D_BONCAT- | 30 cm        | 48h             | BONCAT - | 75000                  | 155187                                              | 89480                                     | 139         | 105                          |
| 76cm_2h_A_BONCAT+  | 76 cm        | 2h              | BONCAT + | 35000                  | 163551                                              | 163183                                    | 194         | 131                          |
| 76cm_2h_A_BONCAT-  | 76 cm        | 2h              | BONCAT - | 50000                  | 122347                                              | 120373                                    | 74          | 53                           |
| 76cm_2h_B_BONCAT+  | 76 cm        | 2h              | BONCAT + | 65000                  | 240574                                              | 240285                                    | 199         | 143                          |
| 76cm_2h_B_BONCAT-  | 76 cm        | 2h              | BONCAT - | 75000                  | 154938                                              | 152259                                    | 55          | 42                           |
| 76cm_2h_C_BONCAT+  | 76 cm        | 2h              | BONCAT + | 73000                  | 149499                                              | 149499                                    | 268         | 187                          |
| 76cm_2h_C_BONCAT-  | 76 cm        | 2h              | BONCAT - | 75000                  | 115293                                              | 115293                                    | 166         | 109                          |
| 76cm_48h_A_BONCAT+ | 76 cm        | 48h             | BONCAT + | 75000                  | 736900                                              | 736231                                    | 161         | 129                          |
| 76cm_48h_A_BONCAT- | 76 cm        | 48h             | BONCAT - | 45000                  | 146726                                              | 130866                                    | 57          | 38                           |
| 76cm_48h_B_BONCAT+ | 76 cm        | 48h             | BONCAT + | 75000                  | 257443                                              | 257311                                    | 403         | 269                          |
| 76cm_48h_B_BONCAT- | 76 cm        | 48h             | BONCAT - | 35000                  | 127528                                              | 113817                                    | 126         | 87                           |
| 76cm_48h_C_BONCAT+ | 76 cm        | 48h             | BONCAT + | 50000                  | 484680                                              | 482851                                    | 613         | 441                          |
| 76cm_48h_C_BONCAT- | 76 cm        | 48h             | BONCAT - | 75000                  | 164342                                              | 160961                                    | 135         | 99                           |
| 76cm_A_filter      | 76 cm        | -               | FILTER   | -                      | 305866                                              | 305866                                    | 528         | 381                          |
| 76cm_B_filter      | 76 cm        | -               | FILTER   | -                      | 336054                                              | 336054                                    | 561         | 421                          |
| 76cm_C_filter      | 76 cm        | -               | FILTER   | -                      | 175457                                              | 175457                                    | 373         | 281                          |
| 30cm_A_filter      | 30 cm        | -               | FILTER   | -                      | 327415                                              | 327415                                    | 567         | 406                          |
| 30cm_B_filter      | 30 cm        | -               | FILTER   | -                      | 260298                                              | 260298                                    | 412         | 296                          |
| 30cm_C_filter      | 30 cm        | -               | FILTER   | -                      | 141273                                              | 141273                                    | 338         | 246                          |
| 76cm_total_soil    | 76 cm        | -               | SOIL     | -                      | 349341                                              | 349341                                    | 390         | 324                          |
| 30cm_total_soil    | 30 cm        | -               | SOIL     | -                      | 314201                                              | 314201                                    | 916         | 620                          |

\*Number of sequences after QC and denoising, note that DADA2 removed all singletons

\*\*ESV: Exact Sequence Variant

**Supplementary table 2: Experimental design and cell recovery rate from the killed control (PFA treated) samples**

| Sample ID                 | Pre-incubation treatment | Incubation (2h) | Post-incubation treatment | total extracted cell count per g of soil | average recovery per g of soil |
|---------------------------|--------------------------|-----------------|---------------------------|------------------------------------------|--------------------------------|
| pre_incubation_PFA_2h_A   | PFA                      | HPG 50 $\mu$ M  |                           | 3.7E+07                                  | <b>2.8E+07</b>                 |
| pre_incubation_PFA_2h_B   | PFA                      | HPG 50 $\mu$ M  |                           | 1.9E+07                                  |                                |
| PFA_water_control         | PFA                      | water           |                           | NA                                       | NA                             |
| post_incubation_PFA_2h_A  |                          | HPG 50 $\mu$ M  | PFA                       | 1.6E+07                                  | <b>1.6E+07</b>                 |
| post_incubation_PFA_2h_B  |                          | HPG 50 $\mu$ M  | PFA                       | 1.5E+07                                  |                                |
| HPG_2h_A                  |                          | HPG 50 $\mu$ M  |                           | 2.7E+07                                  | <b>2.8E+07</b>                 |
| HPG_2h_B                  |                          | HPG 50 $\mu$ M  |                           | 2.9E+07                                  |                                |
| water control             |                          | water           |                           | NA                                       | NA                             |
| pre_incubation_PFA_48h_A  | PFA                      | HPG 50 $\mu$ M  |                           | 1.7E+07                                  | <b>2.1E+07</b>                 |
| pre_incubation_PFA_48h_B  | PFA                      | HPG 50 $\mu$ M  |                           | 2.4E+07                                  |                                |
| PFA_water_control         | PFA                      | water           |                           | NA                                       | NA                             |
| post_incubation_PFA_48h_A |                          | HPG 50 $\mu$ M  | PFA                       | 1.9E+07                                  | <b>2.1E+07</b>                 |
| post_incubation_PFA_48h_B |                          | HPG 50 $\mu$ M  | PFA                       | 2.4E+07                                  |                                |
| HPG_48h_A                 |                          | HPG 50 $\mu$ M  |                           | 2.2E+07                                  | <b>2.5E+07</b>                 |
| HPG_48h_B                 |                          | HPG 50 $\mu$ M  |                           | 2.7E+07                                  |                                |
| water control             |                          | water           |                           | NA                                       | NA                             |



**Supplementary table 3: Cells recovery rate in PBS according to cell extraction method (from 30 cm soil)**

|          | <b>Vortex (5min)</b> | <b>Sonication (5min)*</b> | <b>0.02% Tween addition</b> | <b>0.22 µm filter capture**</b> | <b>Recovery (cell per g of soil)</b> |
|----------|----------------------|---------------------------|-----------------------------|---------------------------------|--------------------------------------|
| <b>1</b> | x                    |                           |                             |                                 | 1.19E+07                             |
| <b>2</b> | x                    | x                         |                             |                                 | 1.99E+07                             |
| <b>3</b> | x                    |                           | x                           |                                 | 2.57E+07                             |
| <b>4</b> | x                    | x                         | x                           |                                 | 2.62E+07                             |
| <b>5</b> | x                    |                           | x                           | x                               | 1.53E+07                             |
| <b>6</b> | x                    | x                         | x                           | x                               | 1.99E+07                             |

*\*The sonication (5 min in sonication bath) step did not improve the cell recovery rate so this step was omitted in the final protocol*

*\*\*After being capture on a 0.22 µm filter the cells were released by vortexing the filter for 5 min in PBS + 0.02% Tween*
