# Supplementary material for: Probing the active fraction of soil microbiomes using BONCAT-FACS
Source: PubMed Central journal article supplement (PMC6591230; doi:10.1038/s41467-019-10542-0), 2019-06-24
Supplement: 41467_2019_10542_MOESM2_ESM.pdf [file 41467_2019_10542_MOESM2_ESM.pdf]

## **Description of Additional Supplementary Files**

File Name: Supplementary Data 1

Description: Partial 16S Ribosomal RNA genes sequences from the ENIGMA culture collection.
